# Supplementary material for: Teaching the Tough Topics: Fostering Ideological Awareness through the Inclusion of Societally Impactful Topics in Introductory Biology
Source: Atypon-hosted journal article supplement (doi:10.1187/cbe.21-04-0100), 2021-11-12
Supplement: combinedsupmats.pdf [file combinedsupmats.pdf]

# Supplemental Material

CBE—Life Sciences Education

**Beatty *et al.***

# AUM Introductory Biology

## Survey Flow

**Standard: Block 6 (1 Question)**

**Block: Demographics (10 Questions)**

**Standard: Science Identity (5 Questions)**

**Standard: Engagement in Biology (7 Questions)**

**Standard: Scientific Community Value (5 Questions)**

**Standard: Course Effectiveness (7 Questions)**

**Standard: Diversity and Identity (5 Questions)**

Page Break

---

---

**Start of Block: Block 6**

## **RESEARCH SUBJECT INFORMATION LETTER**

### **Biodiversifying Introductory Biology: The integration of non-stereotypical scientists into course materials**

This form provides essential information about the research study resulting from the survey you are being asked to complete. You are being invited to participate in this study because you are a student in the Introductory Biology course at Auburn University Montgomery Campus.

#### **PURPOSE OF THE STUDY**

The purpose of this research study is to improve teaching materials for introductory biology courses in an equitable and inclusive manner. Data will be used to enhance future teaching materials examining the intersection between science and society.

#### **DESCRIPTION OF THE STUDY AND YOUR INVOLVEMENT**

For this study, you will be one of many participants over the Fall of 2020 evaluating the teaching methods within the introductory biology curriculum. You will be asked to participate by completing a short survey four times over the course of the semester. It will take an estimated 10-25 minutes of time to complete the survey.

#### **RISKS, BENEFITS AND COSTS**

There are no expected risks associated with your participation in this survey. You can stop answering survey questions at any time and are not required to answer any questions that make you upset or uncomfortable. If you find that you leave the survey feeling upset about any of the content, an administrator can provide you with the names of counselors that are available. If 80% of the class completes the survey, each student in the class will be awarded 2 bonus points. A survey administrator will be on site and will be available during the survey administration to answer any questions you may have. The administrator will explain the study in detail prior to the first survey administration. At that time, you may ask any questions about your participation or the information provided in this letter. You may take home this form for future reference and discuss your participation with friends or family before choosing to participate.

#### **CONFIDENTIALITY**

No identifiable information will be collected through the survey. Your answers will be anonymous, with each survey being linked by random identifiers. In this case, that will be the first three letters of your mother's first name, and the first three number of your current address. This information is not known to administrators and is unlikely to be associated with a participant. Any raw survey data will be kept in a locked cabinet or safe. Findings from this survey may be used in peer reviewed publications or presentations. Anonymity will continue through publication.

## **VOLUNTARY PARTICIPATION AND WITHDRAWAL**

Participation in this study is not mandatory; however, if you choose to participate, you may leave the study at any time without any consequences within or outside of the classroom.

## **QUESTIONS**

If you have any future questions about participation in the study, available counseling, or questions you prefer to address privately, you can contact:

Abby Beatty, Principal Investigator  
(724) 993-5057  
216 Rouse Life Sciences, Auburn University  
Aeb0084@auburn.edu

AND/OR

Human Research Protection Program (IRB)  
(334) 844-5966  
115 Ramsay Hall, Auburn University  
Auburn, Alabama 36849  
irbadmin@auburn.edu

End of Block: Block 6

---

Start of Block: Demographics

Identifier This information will be used to pair your survey responses over time, which maintaining anonymity.

Remember this information for following surveys.

Please create a pin consisting of the first three letters of your mothers first name and the first three numbers of your street address. (Example: ROX1010)

---

Class Who is your instructor?

- Amy Grilliot (1)
  - Abby Beatty (2)
-

Q1 Age: What is your current age?

18

70

Click to write Choice 1 ( )

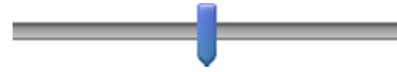

Q2 Ethnic origin: Please specify your ethnicity.

- Hispanic or Latino (1)
- Black or African American (2)
- Native American or American Indian (3)
- Asian/Pacific Islander (4)
- White (5)
- Other (6)

Q3 How many credits have you completed?

- 0-30 (Freshman) (1)
- 31-60 (Sophomore) (2)
- 61-90 (Junior) (3)
- 91-120 (4)

Q4 What is your major?

- Biology (1)
  - Science, but not biology (2)
  - Non-science field (3)
  - Undecided (4)
- 

Q5 What gender do you identify as? Please choose all that apply.

- Male (1)
  - Female (2)
  - Transgender (3)
  - Gender neutral (4)
  - Agendered (5)
  - Other (6)
  - Prefer not to Respond (7)
- 

Q6 Are you a first generation college student?

- Yes (1)
  - No (2)
  - Not sure (3)
-

Q7 Place of birth

- North America (1)
  - Central America (2)
  - South America (3)
  - Europe (4)
  - Africa (5)
  - Asia (6)
  - Australia (7)
  - Pacific Islander (8)
  - Caribbean Islands (9)
  - Other (10)
  - Prefer not to say (11)
- 

Q8 How likely are you to pursue a career in biology?

Extremely likely   Moderately likely   Slightly likely   Neither likely nor unlikely   Slightly unlikely   Moderately unlikely   Extremely unlikely

0   1   2   4   5   6   7

Click to write Choice 1 ()

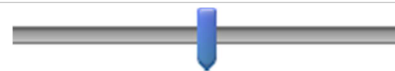

---

End of Block: Demographics

Start of Block: Science Identity



Q9 I have a strong sense of belonging to the scientific community of scientists

Strongly Agree Somewhat Neither Somewhat Disagree Strongly  
agree agree agree disagree disagree  
nor  
disagree

1 2 3 4 5 6 7

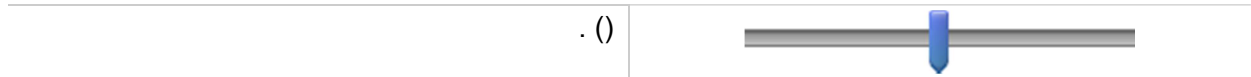

Q10 I derive great personal satisfaction from working on a team that is doing important work

Strongly Agree Somewhat Neither Somewhat Disagree Strongly  
agree agree agree disagree disagree  
nor  
disagree

1 2 3 4 5 6 7

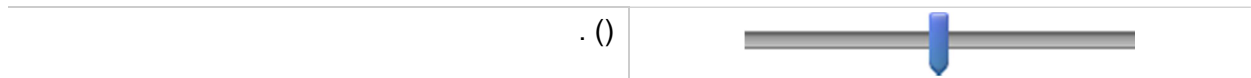

Q11 I have come to think of myself as a scientist

Strongly Agree Somewhat Neither Somewhat Disagree Strongly  
agree agree agree disagree disagree  
nor  
disagree

1 2 3 4 5 6 7

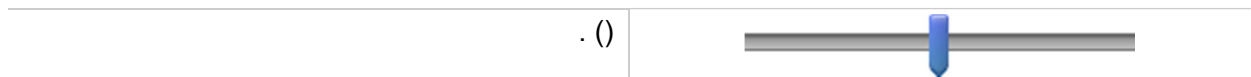

Q12 I feel like I belong in the field of science

Strongly Agree Somewhat Neither Somewhat Disagree Strongly  
agree agree agree disagree disagree  
nor  
disagree

1 2 3 4 5 6 7



Q13 The daily work of a scientist is greatly appealing to me

Strongly Agree Somewhat Neither Somewhat Disagree Strongly  
agree agree agree disagree disagree  
nor  
disagree

1 2 3 4 5 6 7



End of Block: Science Identity

Start of Block: Engagement in Biology

Q14 Please answer the following six questions in reference to the first two weeks of the course.

Q15 How hard were you working in class?

Far Moderately Slightly Average Slightly Moderately Far  
above above above average below below below  
average average average average average average

1 2 3 4 5 6 7

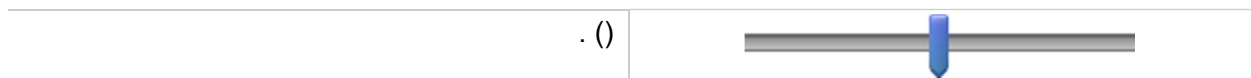

Q16 How well were you concentrating?

Far above average    Moderately above average    Slightly above average    Average    Slightly below average    Moderately below average    Far below average

1    2    3    4    5    6    7

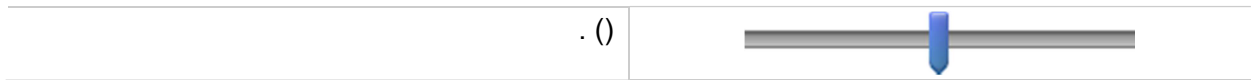

Q17 How important was what you were doing in class to you?

Far above average    Moderately above average    Slightly above average    Average    Slightly below average    Moderately below average    Far below average

1    2    3    4    5    6    7

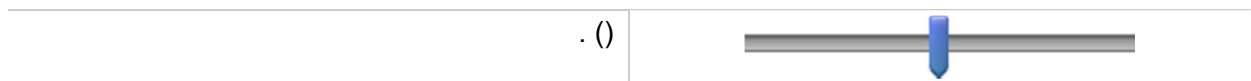

Q18 How important was this lesson to your future?

Far above average    Moderately above average    Slightly above average    Average    Slightly below average    Moderately below average    Far below average

1    2    3    4    5    6    7

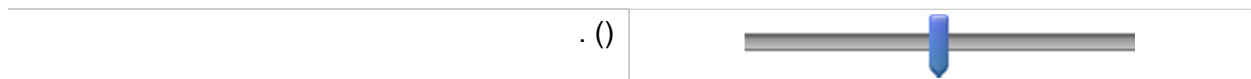

Q19 How interesting were the activities?

Far above average    Moderately above average    Slightly above average    Average    Slightly below average    Moderately below average    Far below average

1    2    3    4    5    6    7

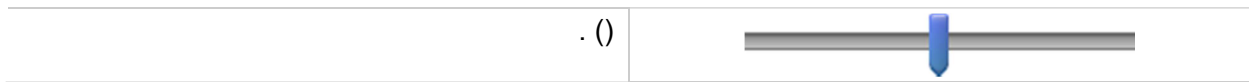

Q20 To what degree did you enjoy what you were doing?

Far above average    Moderately above average    Slightly above average    Average    Slightly below average    Moderately below average    Far below average

1    2    3    4    5    6    7

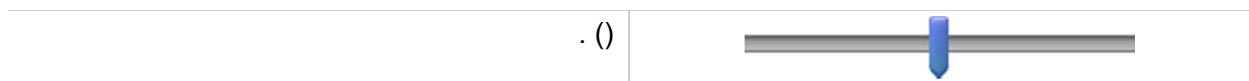

End of Block: Engagement in Biology

Start of Block: Scientific Community Value

Q21 Please answer the following six questions in reference to the first two weeks of the course.

Q22 The material covered in class aligns with your views on the following concept: It is valuable to conduct research that builds the world's scientific knowledge.

Strongly Agree    Somewhat agree    Neither agree nor disagree    Somewhat disagree    Disagree    Strongly disagree

1    2    3    4    5    6    7

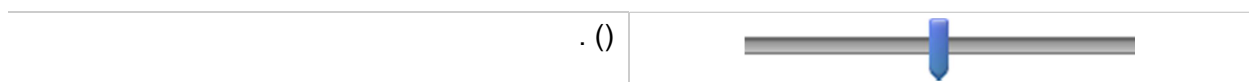

---

Q23 The material covered in class aligns with you views of the following concept: Discovering something new in the sciences is thrilling.

Strongly Agree Somewhat Neither Somewhat Disagree Strongly  
agree agree agree disagree disagree  
nor  
disagree

1 2 3 4 5 6 7

. ()

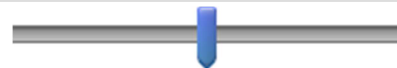

---

Q24 The material covered in class aligns with you views of the following concept: Discussing new theories and ideas between scientists is important.

Strongly Agree Somewhat Neither Somewhat Disagree Strongly  
agree agree agree disagree disagree  
nor  
disagree

1 2 3 4 5 6 7

. ()

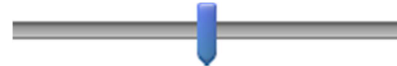

---

Q25 Scientific research can solve many of today's world challenges.

Strongly Agree Somewhat Neither Somewhat Disagree Strongly  
agree agree agree disagree disagree  
nor  
disagree

1 2 3 4 5 6 7

. ()

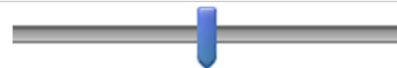

---

End of Block: Scientific Community Value

Start of Block: Course Effectiveness

Q26 Please answer the following six questions in reference to the first two weeks of the course. When asked about the intersection of Biology with Societal issues, some examples of societal issues include topics such as politics, gender identity, racism/diversity, human experimentation, human rights, etc.

Q27 To what degree has this course peaked your curiosity?

Far above average    Moderately above average    Slightly above average    Average    Slightly below average    Moderately below average    Far below average

1    2    3    4    5    6    7

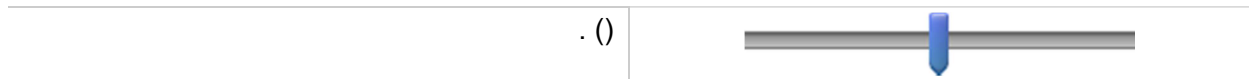

Q28 To what extent is the material taught in this course engaging?

Far above average    Moderately above average    Slightly above average    Average    Slightly below average    Moderately below average    Far below average

1    2    3    4    5    6    7

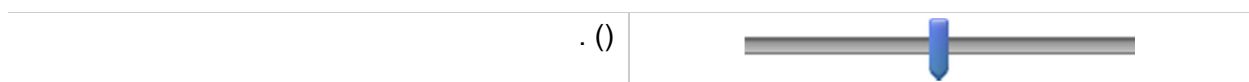

Q29 To what extent is the material offered in this course more meaningful or valuable than that presented in the textbook?

Far above average    Moderately above average    Slightly above average    Average    Slightly below average    Moderately below average    Far below average

1    2    3    4    5    6    7

. ()

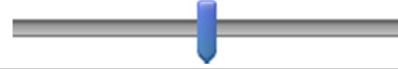

Q30 How knowledgeable do you feel about the impact of Biology on societal issues.

Far above average    Moderately above average    Slightly above average    Average    Slightly below average    Moderately below average    Far below average

1    2    3    4    5    6    7

. ()

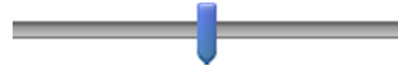

Q31 To what extent has participation in this course prompted you to consider the impacts of science on sensitive societal issues?

Far above average    Moderately above average    Slightly above average    Average    Slightly below average    Moderately below average    Far below average

1    2    3    4    5    6    7

. ()

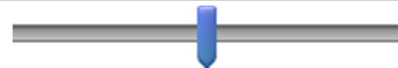

Q32 To what extent does participation in this course create an opportunity for you to examine and openly discuss the impacts of biology on society?

Far above average    Moderately above average    Slightly above average    Average    Slightly below average    Moderately below average    Far below average

1    2    3    4    5    6    7

. ()

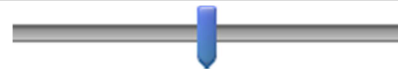

End of Block: Course Effectiveness

---

Start of Block: Diversity and Identity

Q33 In the next two minutes, name all the scientists you can think of.

---

Q34 How does science impact social perspectives and problems?

---

Q35 Name one scientist with whom you personally identify and describe why. The example can come from inside or outside of this course.

---

Q36 Name your favorite scientist and explain why they are your favorite.

---

Q37 What was your favorite topic covered in the course and why?

---

End of Block: Diversity and Identity

---



# AUM Introductory Biology - PostCourse

## Survey Flow

**Standard: Block 6 (1 Question)**  
**Block: Demographics (10 Questions)**  
**Standard: Science Identity (5 Questions)**  
**Standard: Engagement in Biology (7 Questions)**  
**Standard: Scientific Community Value (5 Questions)**  
**Standard: Course Effectiveness (6 Questions)**  
**Standard: Diversity and Identity (5 Questions)**  
**Standard: Valuing STEM (11 Questions)**  
**Standard: The Ugly Truth Module (5 Questions)**  
**Standard: Representation in STEM Module (5 Questions)**  
**Standard: Science and Identity Module (5 Questions)**  
**Standard: Henrietta Lacks Text Questions (7 Questions)**  
**Standard: Final Thoughts (1 Question)**

Page Break

---

## **RESEARCH SUBJECT INFORMATION LETTER**

### **Biodiversifying Introductory Biology: The integration of non-stereotypical scientists into course materials**

This form provides essential information about the research study resulting from the survey you are being asked to complete. You are being invited to participate in this study because you are a student in the Introductory Biology course at Auburn University Montgomery Campus.

#### **PURPOSE OF THE STUDY**

The purpose of this research study is to improve teaching materials for introductory biology courses in an equitable and inclusive manner. Data will be used to enhance future teaching materials examining the intersection between science and society.

#### **DESCRIPTION OF THE STUDY AND YOUR INVOLVEMENT**

For this study, you will be one of many participants over the Fall of 2020 evaluating the teaching methods within the introductory biology curriculum. You will be asked to participate by completing a short survey four times over the course of the semester. It will take an estimated 10-25 minutes of time to complete the survey.

#### **RISKS, BENEFITS AND COSTS**

There are no expected risks associated with your participation in this survey. You can stop answering survey questions at any time and are not required to answer any questions that make you upset or uncomfortable. If you find that you leave the survey feeling upset about any of the content, an administrator can provide you with the names of counselors that are available. If 80% of the class completes the survey, each student in the class will be awarded 2 bonus points. A survey administrator will be on site and will be available during the survey administration to answer any questions you may have. The administrator will explain the study in detail prior to the first survey administration. At that time, you may ask any questions about your participation or the information provided in this letter. You may take home this form for future reference and discuss your participation with friends or family before choosing to participate.

#### **CONFIDENTIALITY**

No identifiable information will be collected through the survey. Your answers will be anonymous, with each survey being linked by random identifiers. In this case, that will be the first three letters of your mother's first name, and the first three number of your current address. This information is not known to administrators and is unlikely to be associated with a participant. Any raw survey data will be kept in a locked cabinet or safe. Findings from this

survey may be used in peer reviewed publications or presentations. Anonymity will continue through publication.

### **VOLUNTARY PARTICIPATION AND WITHDRAWAL**

Participation in this study is not mandatory; however, if you choose to participate, you may leave the study at any time without any consequences within or outside of the classroom.

### **QUESTIONS**

If you have any future questions about participation in the study, available counseling, or questions you prefer to address privately, you can contact:

Abby Beatty, Principal Investigator  
(724) 993-5057  
216 Rouse Life Sciences, Auburn University  
Aeb0084@auburn.edu

AND/OR

Human Research Protection Program (IRB)  
(334) 844-5966  
115 Ramsay Hall, Auburn University  
Auburn, Alabama 36849  
irbadmin@auburn.edu

End of Block: Block 6

---

Start of Block: Demographics

Identifier **This information will be used to pair your survey responses over time, which maintaining anonymity. Remember this information for following surveys.**

Please create a pin consisting of the first three letters of your mothers first name and the first three numbers of your street address. (Example: ROX1010)

---

Class Who is your instructor?

- Amy Grilliot (1)
- Abby Beatty (2)

---

Q1 Age: What is your current age?

18

70

1 ()

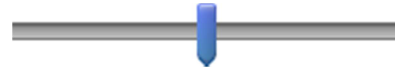

---

Q2 Ethnic origin: Please specify your ethnicity.

- Hispanic or Latino (1)
- Black or African American (2)
- Native American or American Indian (3)
- Asian/Pacific Islander (4)
- White (5)
- Other (6)

---

Q3 How many credits have you completed?

- 0-30 (Freshman) (1)
  - 31-60 (Sophomore) (2)
  - 61-90 (Junior) (3)
  - 91-120 (Senior) (4)
-

Q4 What is your major?

- Biology (1)
  - Science, but not biology (2)
  - Non-science field (3)
  - Undecided (4)
- 

Q5 What gender do you identify as? Please choose all that apply.

- Male (1)
  - Female (2)
  - Transgender (3)
  - Gender neutral (4)
  - Agendered (5)
  - Other (6)
  - Prefer not to Respond (7)
- 

Q6 Are you a first generation college student?

- Yes (1)
  - No (2)
  - Not sure (3)
-

Q7 Place of birth

- North America (1)
  - Central America (2)
  - South America (3)
  - Europe (4)
  - Africa (5)
  - Asia (6)
  - Australia (7)
  - Pacific Islander (8)
  - Caribbean Islands (9)
  - Other (10)
  - Prefer not to say (11)
- 

Q8 How likely are you to pursue a career in biology?

Extremely likely   Moderately likely   Slightly likely   Neither likely nor unlikely   Slightly unlikely   Moderately unlikely   Extremely unlikely

0   1   2   4   5   6   7

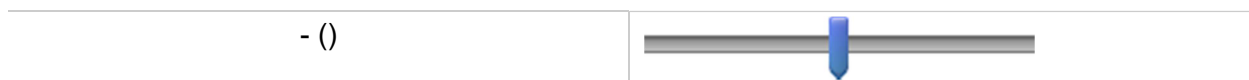

End of Block: Demographics

Start of Block: Science Identity

Q9 I have a strong sense of belonging to the scientific community of scientists

Strongly Agree Somewhat Neither Somewhat Disagree Strongly  
agree agree agree disagree disagree  
nor  
disagree

1 2 3 4 5 6 7

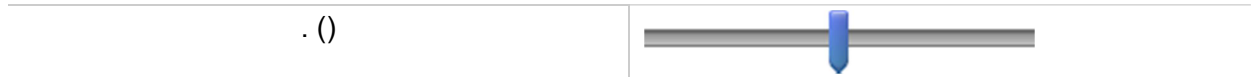

Q10 I derive great personal satisfaction from working on a team that is doing important work

Strongly Agree Somewhat Neither Somewhat Disagree Strongly  
agree agree agree disagree disagree  
nor  
disagree

1 2 3 4 5 6 7

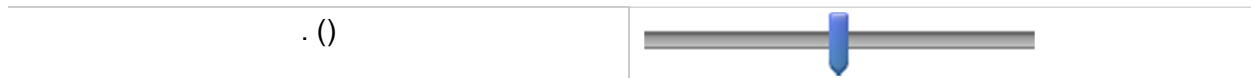

Q11 I have come to think of myself as a scientist

Strongly Agree Somewhat Neither Somewhat Disagree Strongly  
agree agree agree disagree disagree  
nor  
disagree

1 2 3 4 5 6 7

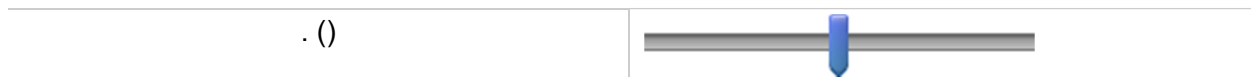

Q12 I feel like I belong in the field of science

Strongly Agree Somewhat Neither Somewhat Disagree Strongly  
agree agree agree disagree disagree  
nor  
disagree  
1 2 3 4 5 6 7



Q13 The daily work of a scientist is greatly appealing to me

Strongly Agree Somewhat Neither Somewhat Disagree Strongly  
agree agree agree disagree disagree  
nor  
disagree  
1 2 3 4 5 6 7



End of Block: Science Identity

Start of Block: Engagement in Biology

**Q14 Please answer the following six questions in reference to your experience in this course.**

Q15 How hard were you working in class?

Far Moderately Slightly Average Slightly Moderately Far  
above above above average below below below  
average average average average average average  
1 2 3 4 5 6 7

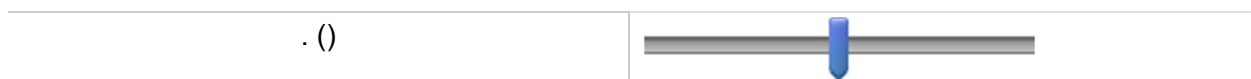



---

Q16 How well were you concentrating?

Far above average    Moderately above average    Slightly above average    Average    Slightly below average    Moderately below average    Far below average

1    2    3    4    5    6    7

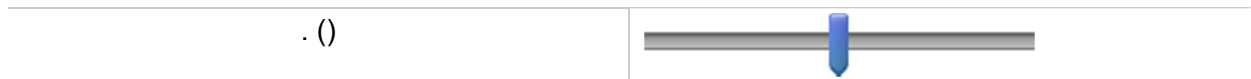

---

Q17 How important was what you were doing in class to you?

Far above average    Moderately above average    Slightly above average    Average    Slightly below average    Moderately below average    Far below average

1    2    3    4    5    6    7

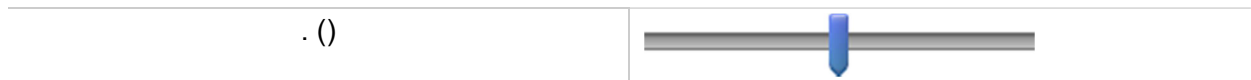

---

Q18 How important was this lesson to your future?

Far above average    Moderately above average    Slightly above average    Average    Slightly below average    Moderately below average    Far below average

1    2    3    4    5    6    7

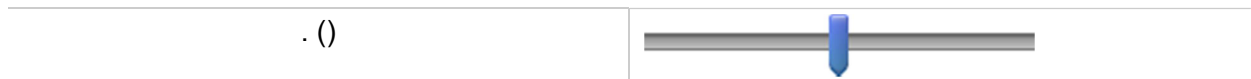

Q19 How interesting were the activities?

Far above average    Moderately above average    Slightly above average    Average    Slightly below average    Moderately below average    Far below average

1    2    3    4    5    6    7

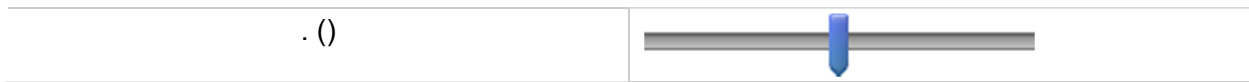

Q20 To what degree did you enjoy what you were doing?

Far above average    Moderately above average    Slightly above average    Average    Slightly below average    Moderately below average    Far below average

1    2    3    4    5    6    7

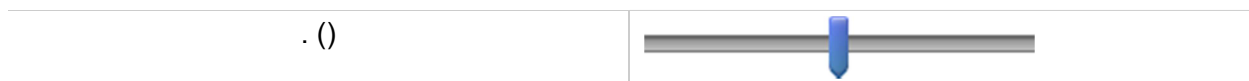

End of Block: Engagement in Biology

Start of Block: Scientific Community Value

**Q21 Please answer the following six questions in reference to your experience in this course.**

Q22 The material covered in class aligns with your views on the following concept: It is valuable to conduct research that builds the world's scientific knowledge.

Strongly Agree    Somewhat agree    Neither agree nor disagree    Somewhat disagree    Disagree    Strongly disagree

1    2    3    4    5    6    7

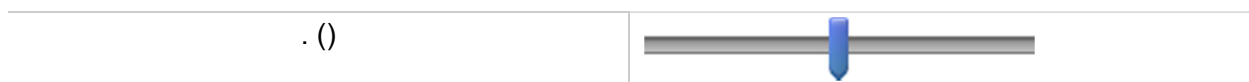

Q23 The material covered in class aligns with you views of the following concept: Discovering something new in the sciences is thrilling.

Strongly Agree Somewhat Neither Somewhat Disagree Strongly  
agree agree agree disagree disagree  
nor  
disagree

1 2 3 4 5 6 7

. ( )

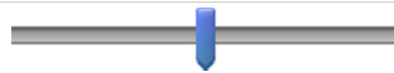

Q24 The material covered in class aligns with you views of the following concept: Discussing new theories and ideas between scientists is important.

Strongly Agree Somewhat Neither Somewhat Disagree Strongly  
agree agree agree disagree disagree  
nor  
disagree

1 2 3 4 5 6 7

. ( )

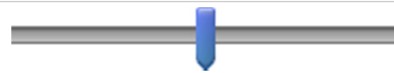

Q25 Scientific research can solve many of today's world challenges.

Strongly Agree Somewhat Neither Somewhat Disagree Strongly  
agree agree agree disagree disagree  
nor  
disagree

1 2 3 4 5 6 7

. ( )

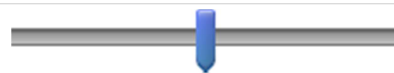

End of Block: Scientific Community Value

---

Start of Block: Course Effectiveness

Q27 To what degree has this course peaked your curiosity?

Far above average    Moderately above average    Slightly above average    Average    Slightly below average    Moderately below average    Far below average

1    2    3    4    5    6    7

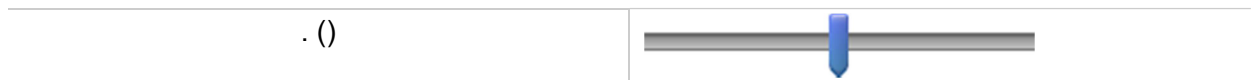

Q28 To what extent is the material taught in this course engaging?

Far above average    Moderately above average    Slightly above average    Average    Slightly below average    Moderately below average    Far below average

1    2    3    4    5    6    7

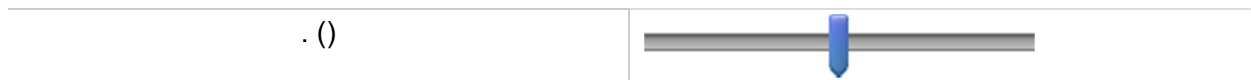

Q29 To what extent is the material offered in this course more meaningful or valuable than that presented in the textbook?

Far above average    Moderately above average    Slightly above average    Average    Slightly below average    Moderately below average    Far below average

1    2    3    4    5    6    7

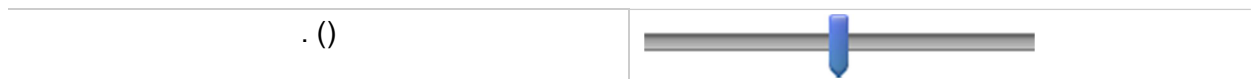

Q30 How knowledgeable do you feel about the impact of Biology on societal issues.

Far above average    Moderately above average    Slightly above average    Average    Slightly below average    Moderately below average    Far below average

1    2    3    4    5    6    7

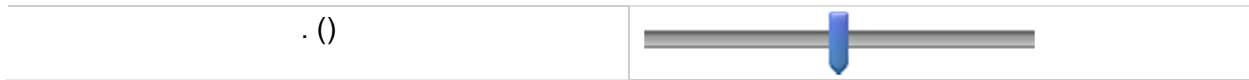

Q31 To what extent has participation in this course prompted you to consider the impacts of science on sensitive societal issues?

Far above average    Moderately above average    Slightly above average    Average    Slightly below average    Moderately below average    Far below average

1    2    3    4    5    6    7

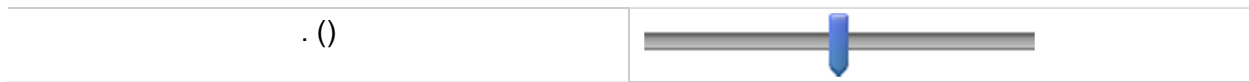

Q32 To what extent does participation in this course create an opportunity for you to examine and openly discuss the impacts of biology on society?

Far above average    Moderately above average    Slightly above average    Average    Slightly below average    Moderately below average    Far below average

1    2    3    4    5    6    7

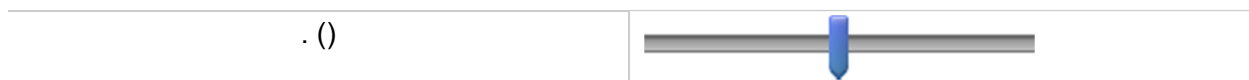

End of Block: Course Effectiveness

Start of Block: Diversity and Identity

Q33 In the next two minutes, name all the scientists you can think of.

---

---

---

---

---

---

Q34 How does science impact social perspectives and problems?

---

---

---

---

---

---

Q35 Name one scientist with whom you personally identify and describe why. The example can come from inside or outside of this course.

---

---

---

---

---

---

Q36 Name your favorite scientist and explain why they are your favorite.

---

---

---

---

---

Q37 What was your favorite topic covered in the course and why?

---

---

---

---

---

End of Block: Diversity and Identity

Start of Block: Valuing STEM

Q49 How important is it for you to learn about science?

Extremely important   Very important   Moderately important   Slightly important   Not at all important

1                      2                      3                      4                      5

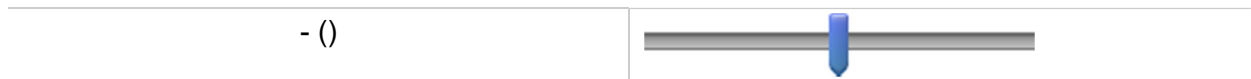

Q50 Scientists think about how the natural world thinks and affects our lives. How important is it for you to think like this?

Extremely important   Very important   Moderately important   Slightly important   Not at all important

1                      2                      3                      4                      5

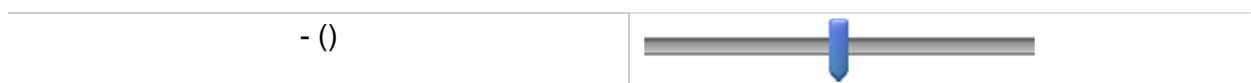

Q51 Science make the world a better place to live

Strongly Agree   Somewhat agree   Neither agree nor disagree   Somewhat disagree   Disagree   Strongly disagree

1   2   3   4   5   6   7

- ()

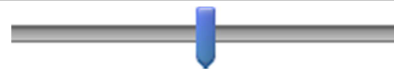

Q52 Science makes the world a better place to live.

Strongly Agree   Somewhat agree   Neither agree nor disagree   Somewhat disagree   Disagree   Strongly disagree

1   2   3   4   5   6   7

- ()

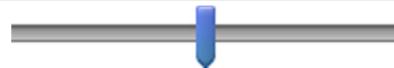

Q53 I think scientists have the most important job in the world.

Strongly Agree   Somewhat agree   Neither agree nor disagree   Somewhat disagree   Disagree   Strongly disagree

1   2   3   4   5   6   7

- ()

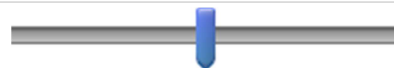



Q54 Science is the most important thing in the world for me to learn.

Strongly Agree Somewhat Neither Somewhat Disagree Strongly  
agree agree agree disagree disagree  
nor  
disagree

1 2 3 4 5 6 7

- ()

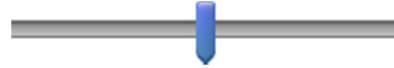

Q55 Knowing and understanding science is important for being a good citizen.

Strongly Agree Somewhat Neither Somewhat Disagree Strongly  
agree agree agree disagree disagree  
nor  
disagree

1 2 3 4 5 6 7

- ()

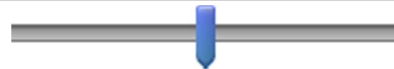

Q56 I think science is more important to know than anything else

Strongly Agree Somewhat Neither Somewhat Disagree Strongly  
agree agree agree disagree disagree  
nor  
disagree

1 2 3 4 5 6 7

- ()

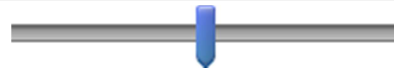

Q57 Knowing science helps me understand how the world works.

Strongly Agree Somewhat Neither Somewhat Disagree Strongly  
agree agree agree disagree disagree  
nor  
disagree  
1 2 3 4 5 6 7

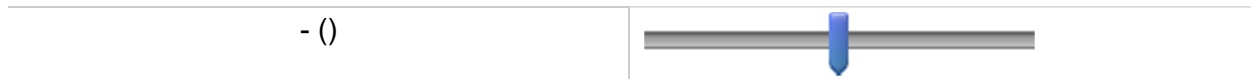

Q58 Thinking like a scientist will help me in understanding societal issues.

Strongly Agree Somewhat Neither Somewhat Disagree Strongly  
agree agree agree disagree disagree  
nor  
disagree  
1 2 3 4 5 6 7

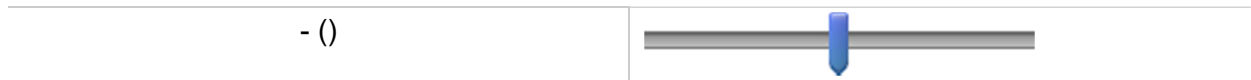

Q59 Thinking like a scientist will help me do well in...

- All of my classes (1)
- Most of my classes (2)
- A few classes (3)
- None of my classes (4)

End of Block: Valuing STEM

Start of Block: The Ugly Truth Module

Display This Question:

If Who is your instructor? = Abby Beatty

**Q81 Please answer the following questions in reference to "The Ugly Truth of Science History" Module:**

**This module included human experimentation, the evolution of human rights, environmental racism, and disparities in health care.**

*Display This Question:*

*If Who is your instructor? = Abby Beatty*

Q48 I enjoyed the "The Ugly Truth of Science History" module.

Strongly Agree   Somewhat   Neither   Somewhat   Disagree   Strongly  
agree   agree   agree   disagree   disagree  
nor  
disagree

1   2   3   4   5   6   7

- ()

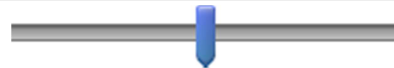

*Display This Question:*

*If Who is your instructor? = Abby Beatty*

Q69 I was aware of the information presented in this module prior to class.

Strongly Agree   Somewhat   Neither   Somewhat   Disagree   Strongly  
agree   agree   agree   disagree   disagree  
nor  
disagree

1   2   3   4   5   6   7

- ()

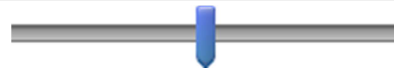

*Display This Question:*

*If Who is your instructor? = Abby Beatty*

Q67 What did you like about the "The Ugly Truth of Science History" module?

---

---

---

---

---

---

*Display This Question:*

*If Who is your instructor? = Abby Beatty*

Q68 What did you dislike about the "The Ugly Truth of Science History" module?

---

---

---

---

---

End of Block: The Ugly Truth Module

---

Start of Block: Representation in STEM Module

*Display This Question:*

*If Who is your instructor? = Abby Beatty*

**Q80 Please answer the following questions in reference to the "Representation in STEM" Module:**

**This module included information on the lack of diversity in STEM fields, the importance of role models, an explanations of contributions of scientists from diverse backgrounds, and guidance on what you can do to help.**

---

*Display This Question:*

*If Who is your instructor? = Abby Beatty*

Q71 I enjoyed the "Representation in STEM" module.

Strongly Agree Somewhat Neither Somewhat Disagree Strongly  
agree agree agree disagree disagree  
nor  
disagree  
1 2 3 4 5 6 7

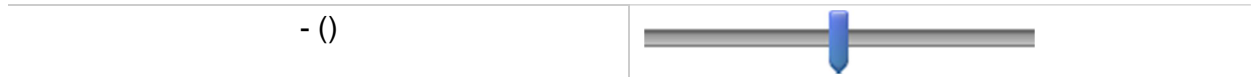

*Display This Question:*  
*If Who is your instructor? = Abby Beatty*

Q72 I was aware of the information presented in this module prior to class.

Strongly Agree Somewhat Neither Somewhat Disagree Strongly  
agree agree agree disagree disagree  
nor  
disagree  
1 2 3 4 5 6 7

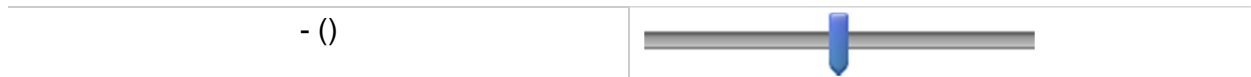

*Display This Question:*  
*If Who is your instructor? = Abby Beatty*

Q73 What did you like about the "Representation in STEM" module?

---

---

---

---

---

Display This Question:

If Who is your instructor? = Abby Beatty

Q74 What did you dislike about the "Representation in STEM" module?

---

---

---

---

---

End of Block: Representation in STEM Module

Start of Block: Science and Identity Module

Display This Question:

If Who is your instructor? = Abby Beatty

Q79 Please answer the following questions in reference to the "Science and Identity Module":

This module included the relationship of science and race, gender, and religion.

Display This Question:

If Who is your instructor? = Abby Beatty

Q75 I enjoyed the "The Science and Society" module.

Strongly Agree Somewhat Neither Somewhat Disagree Strongly  
agree agree agree disagree disagree  
nor  
disagree

1 2 3 4 5 6 7

- ()

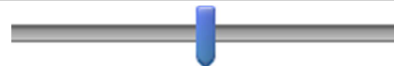

*Display This Question:*  
*If Who is your instructor? = Abby Beatty*

Q76 I was aware of the information presented in this module prior to class.

Strongly Agree   Somewhat Agree   Neither agree nor disagree   Somewhat Disagree   Strongly Disagree

1   2   3   4   5   6   7

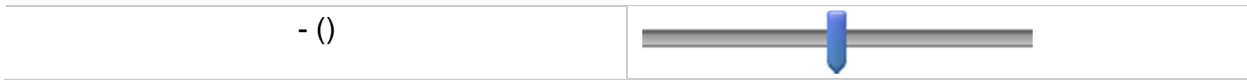

*Display This Question:*  
*If Who is your instructor? = Abby Beatty*

Q77 What did you like about the "Science and Identity" module?

---

---

---

---

---

*Display This Question:*  
*If Who is your instructor? = Abby Beatty*

Q78 What did you dislike about the "Science and Identity" module?

---

---

---

---

---

End of Block: Science and Identity Module

Start of Block: Henrietta Lacks Text Questions

Display This Question:  
If Who is your instructor? = Abby Beatty

Q60 I enjoyed reading the Henrietta Lacks text.

Strongly Agree Somewhat Neither Somewhat Disagree Strongly  
agree agree agree disagree disagree  
nor  
disagree

1 2 3 4 5 6 7

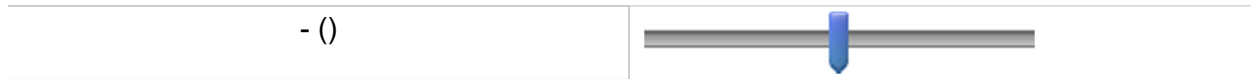

Display This Question:  
If Who is your instructor? = Abby Beatty

Q61 I believe reading the Henrietta Lacks text was engaging.

Strongly Agree Somewhat Neither Somewhat Disagree Strongly  
agree agree agree disagree disagree  
nor  
disagree

1 2 3 4 5 6 7

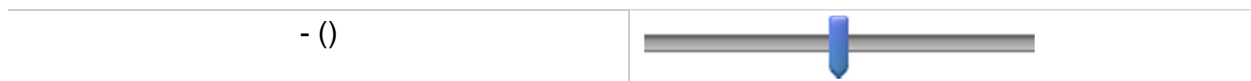

Display This Question:  
If Who is your instructor? = Abby Beatty



Q62 I learned new information about sciences use in society by reading the Henrietta Lacks text.

Strongly Agree Somewhat Neither Somewhat Disagree Strongly  
agree agree agree disagree disagree  
nor  
disagree  
1 2 3 4 5 6 7

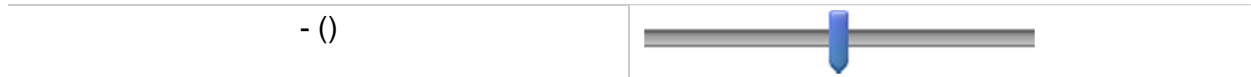

*Display This Question:*  
*If Who is your instructor? = Abby Beatty*

Q65 Reading the Henrietta Lacks text was more engaging than reading a textbook.

Strongly Agree Somewhat Neither Somewhat Disagree Strongly  
agree agree agree disagree disagree  
nor  
disagree  
1 2 3 4 5 6 7

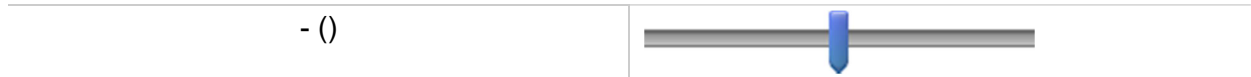

*Display This Question:*  
*If Who is your instructor? = Abby Beatty*

Q66 The information I learned from the Henrietta Lacks text was more useful to me than information from reading a textbook.

Strongly Agree Somewhat Neither Somewhat Disagree Strongly  
agree agree agree disagree disagree  
nor  
disagree  
1 2 3 4 5 6 7

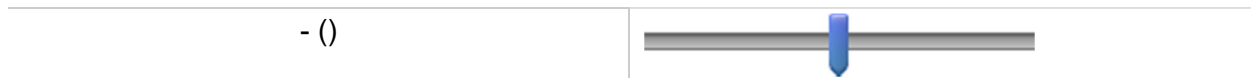

---

*Display This Question:*

*If Who is your instructor? = Abby Beatty*

Q63 What did you like about reading the Henrietta Lacks text?

---

---

---

---

---

---

*Display This Question:*

*If Who is your instructor? = Abby Beatty*

Q64 What did you dislike about reading the Henrietta Lacks text?

---

---

---

---

---

**End of Block: Henrietta Lacks Text Questions**

---

**Start of Block: Final Thoughts**

Q82 If there are any final thoughts you would like to share, please do so here:

---

---

---

---

---

**End of Block: Final Thoughts**

---
